# Supplementary material for: How Did Breast Cancer Patients Fare during Different Phases of the COVID-19 Pandemic in Norway Compared to Age-Matched Controls?
Source: MDPI journal article supplement (doi:10.3390/cancers16030602), 2024-01-31
Supplement: s1 [file s1]

## Symptom scales

← Lower is better

### Fatigue

Other  
Oslo/Viken

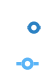

### Difference (95% CI)

9.85 (8.59 , 11.12)  
11.70 (9.56 , 13.83)

### Nausea

Other  
Oslo/Viken

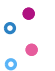

2.75 (2.12 , 3.37)  
3.05 (1.99 , 4.11)

### Pain

Other  
Oslo/Viken

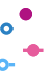

2.87 (1.47 , 4.28)  
4.50 (2.13 , 6.88)

### Dyspnoea

Other  
Oslo/Viken

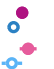

1.28 (0.12 , 2.44)  
2.39 (0.43 , 4.35)

### Insomnia

Other  
Oslo/Viken

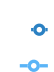

4.25 (2.66 , 5.84)  
6.37 (3.69 , 9.05)

### Appetite loss

Other  
Oslo/Viken

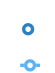

7.89 (6.77 , 9.01)  
7.59 (5.69 , 9.48)

### Constipation

Other  
Oslo/Viken

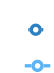

3.93 (2.49 , 5.38)  
4.75 (2.31 , 7.19)

### Diarrhoea

Other  
Oslo/Viken

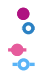

-0.76 (-2.01 , 0.49)  
-0.94 (-3.05 , 1.17)

### Financial difficulties

Other  
Oslo/Viken

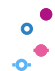

2.83 (1.77 , 3.88)  
2.88 (1.10 , 4.66)

0 10 20 30 40 50

Mean

## Function scales

Higher is better →

### Global quality of life

Other  
Oslo/Viken

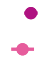

### Difference (95% CI)

-9.29 (-10.40 , -8.17)  
-10.31 (-12.19 , -8.43)

### Physical functioning

Other  
Oslo/Viken

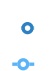

-3.82 (-4.71 , -2.93)  
-4.27 (-5.78 , -2.77)

### Social functioning

Other  
Oslo/Viken

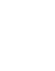

-14.32 (-15.66 , -12.98)  
-15.88 (-18.14 , -13.62)

### Role functioning

Other  
Oslo/Viken

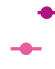

-18.46 (-19.96 , -16.95)  
-20.36 (-22.91 , -17.82)

### Emotional functioning

Other  
Oslo/Viken

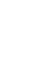

-7.14 (-8.23 , -6.06)  
-9.47 (-11.29 , -7.64)

### Cognitive functioning

Other  
Oslo/Viken

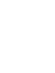

-3.99 (-5.07 , -2.91)  
-3.77 (-5.59 , -1.95)

60 70 80 90

Mean

● Case ● Control
